# Supplementary material for: Synthesis of cyclic polymers and flaws of the Jacobson–Stockmayer theory
Source: Royal Society of Chemistry journal article supplement (doi:10.1039/d0py00226g), 2020-01-01

## Supplemental Information

### Synthesis of Cyclic Polymers and Flaws of the Jacobson-Stockmayer Theory

Hans R. Kricheldorf, Steffen M. Weidner and Felix Scheliga

**Figure S1** MALDI TOF mass spectra of poly(L-lactide)s prepared with SnCN at 160°C in bulk (Lac/cat = 100/1): A) after 1 h (No. 3A Table 2), B) after 4 h (No. 3B, Table 2). (reprinted from ref. 25 with permission of Elsevier)

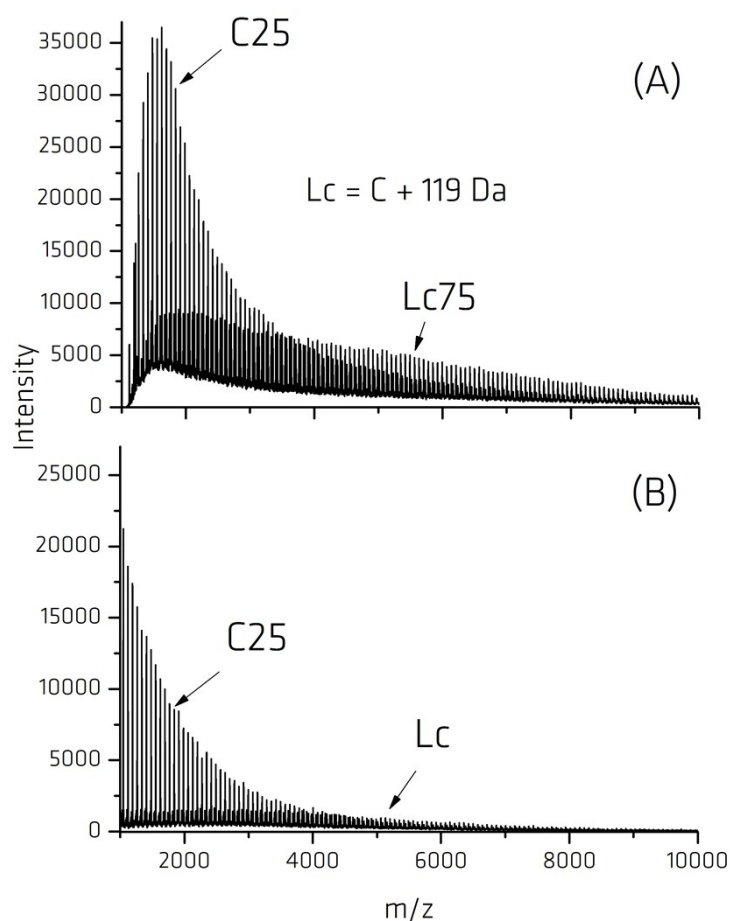

**Figure S2** MALDI TOF mass spectrum of a poly(l-lactide) polymerized with BuSnSPF in bulk at 180°C (No. 2, Table 3)

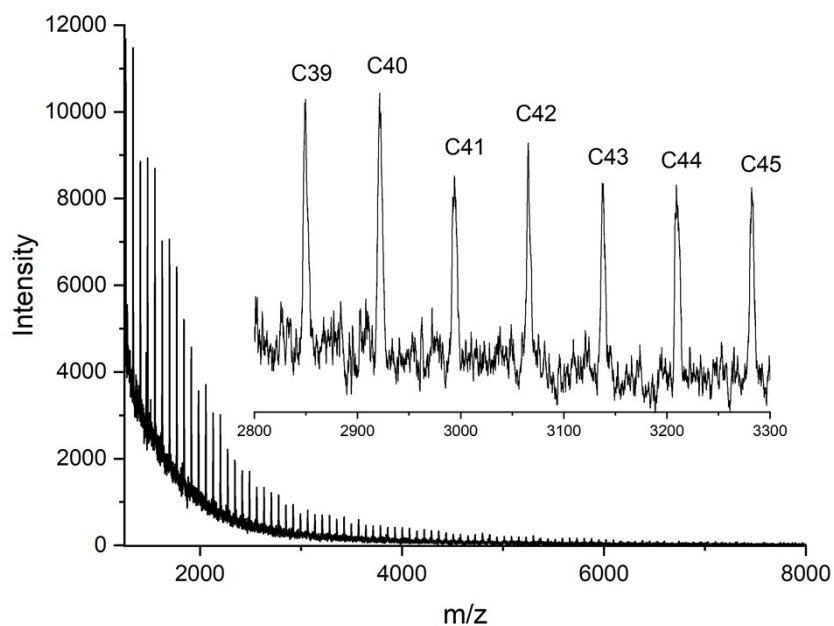

**Figure S3** Intrinsic viscosities (MHS measurements) of poly(l-lactide)s prepared by means of BuSnSPF in bulk according to the experiments listed in Table 3

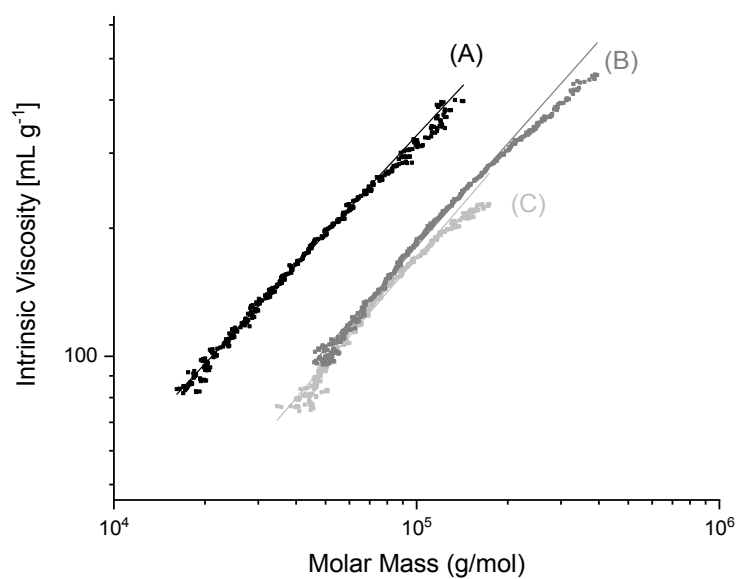

**Figure S4** MALDI-TOF mass spectra of poly(L-lactide)s prepared with Bu<sub>3</sub>SnCl, (A) 100/1, (B) with Ph<sub>2</sub>SnCl<sub>2</sub> 200/1 (reprinted from ref. 28 with permission of Wiley)

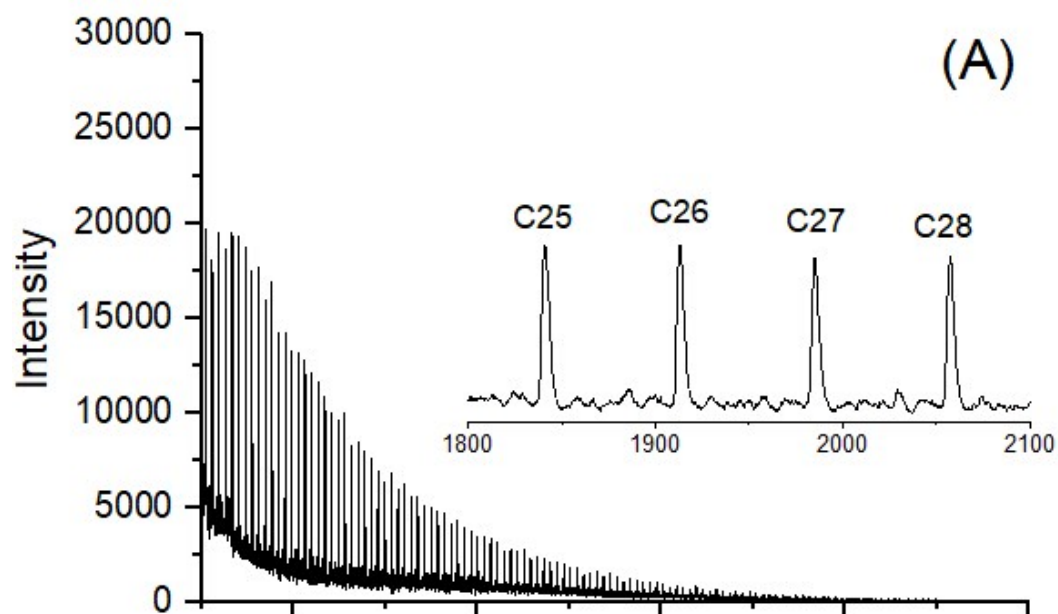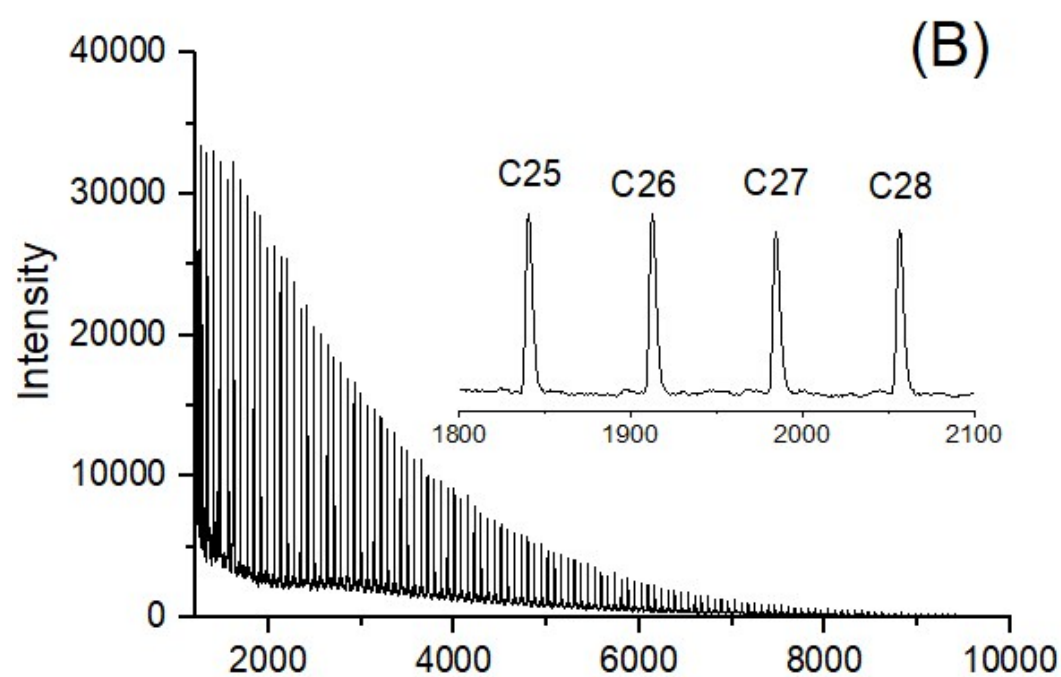

**Figure S5** MHS measurements of poly(L-lactide)s: (A) Purapol L105, (B) prepared with  $\text{Bu}_3\text{SnCl}$  100/1 and (C) with  $\text{Bu}_3\text{SnCl}$ , 600/1 (reprinted from ref. 28 with permission of Wiley)

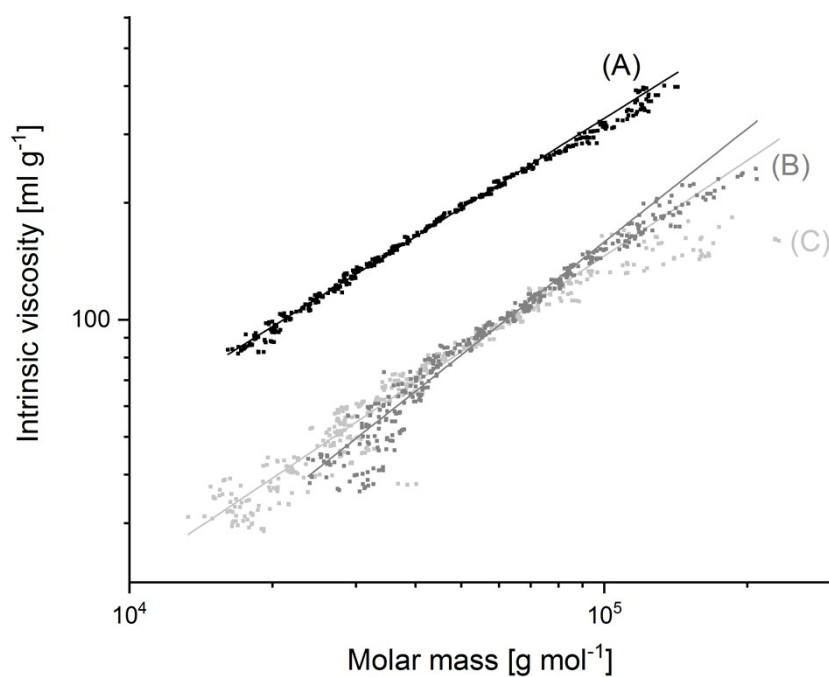

**Figure S6** MHS measurements of poly(L-lactide)s. (A) Purapol L105, (B) prepared with  $\text{Ph}_2\text{SnCl}_2$ , 100/1, (C) prepared with  $\text{Bu}_3\text{SnCl}$ , 600/1 (reprinted from ref. 28 with permission of Wiley)

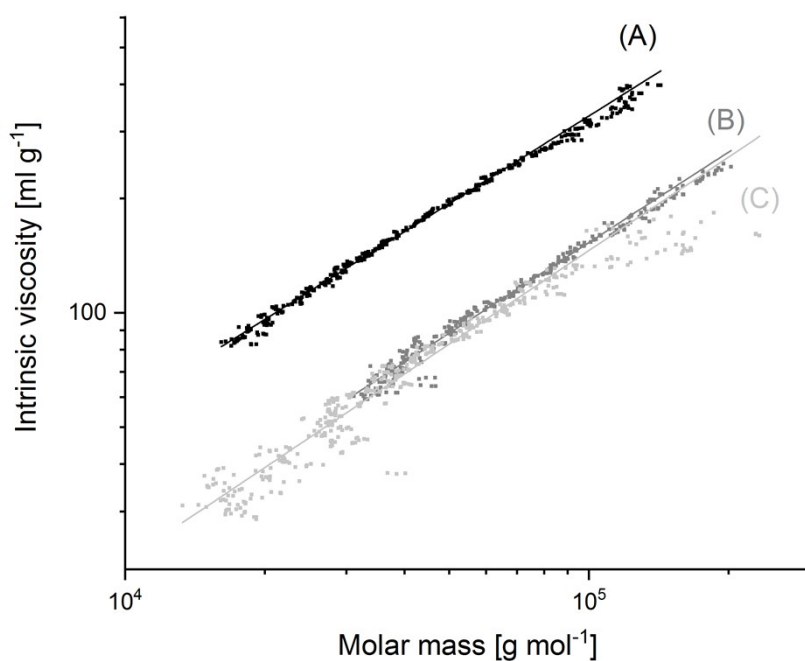

Supplement: d0py00226g1.pdf [file d0py00226g1.pdf]
